# Supplementary material for: Analysis of selected variables in body composition, upper limb strength, and resting energy expenditure among youth soccer players: insights based on field position
Source: PeerJ. 2025 Aug 29;13:e19860. doi: 10.7717/peerj.19860 (PMC12401017; doi:10.7717/peerj.19860)
Supplement: Supplemental Information 1 [file peerj-13-19860-s001.xlsx]

## Sheet: Arkusz1
Lp.	Study date	Sex	Date of birth		Miejsce zamieszkania	Height [cm]	Systolic BP	Diastolic BP	Tętno	Dynamometr - hand grip[kg]		Field position	DXA							REE
				Age [years]						Left hand	Right hand	attacker - 1, defender - 2, goalkeeper - 2, midfielder - 4	Body Mass [kg]	FFM [g]	Fat mass [g]	Fat mass [%]	BMC (bone mass) [g]	BMD [g/cm2]	z-score	REE [kcal]
62	2022-03-08	M	2012-03-08	10.0055	M	128	105	66	83	12	13	1	26,92	21341	4487	17,4	1 094,1	0,730	0,1	1226
81	2022-03-08	M	2011-11-21	10.3014	W	148	108	44	79	16	15	1	45,01	29560	13908	32,0	1 543,9	0,845	1,2	1608
115	2022-03-08	M	2011-11-11	10.3288	M	144	107	61	70	15	13	2	31,88	24875	5622	18,4	1 384,6	0,739	0,0	1342
2	2022-02-10	M	2011-10-04	10.3616	M	143	102	70	85	11	9	2	30,90	23977	5493	18,6	1 431,3	0,767	1,8	1368
125	2022-03-08	M	2011-10-29	10.3644	W	137	108	57	93	12	10	4	30,57	23184	6125	20,9	1 259,7	0,695	-0.5	1336
74	2022-02-10	M	2011-10-02	10.3671	M	135	102	65	85	11	11	1	29,30	22172	5941	21,1	1 191,2	0,709	-0.3	1302
101	2022-02-10	M	2011-09-30	10.3726	W	143	92	61	82	10	16	2	33,49	25794	6140	19,2	1 556,5	0,827	1,0	1373
119	2022-02-10	M	2011-09-24	10.389	W	134	76	50	56	12	12	2	31,08	24017	5816	19,5	1 244,6	0,748	0,1	1269
138	2022-02-10	M	2011-08-07	10.5205	M	145	108	58	87	15	16	1	42,33	29250	11457	28,1	1 625,9	0,846	1,1	1710
92	2022-03-08	M	2011-08-21	10.5534	M	141	85	52	61	15	17	1	37,07	25227	10427	29,2	1 419,6	0,836	1,0	1321
70	2022-03-08	M	2011-08-04	10.6	W	137	111	71	80	13	16	1	28,49	22915	4278	15,7	1 293,3	0,811	0,5	1202
150	2022-02-10	M	2011-07-07	10.6055	W	145.5	88	56	69	15	18	4	35,45	25738	8219	24,2	1 488,1	0,763	0,1	1421
20	2022-02-09	M	2011-06-21	10.6466	W	144	115	50	67	19	23	1	36,58	26180	8923	25,4	1 478,5	0,798	0,5	1560
108	2022-02-10	M	2011-06-22	10.6466	M	140	87	61	88	8	11	1	32,03	22554	8220	26,7	1 251,8	0,751	0,0	1291
135	2022-03-08	M	2011-06-07	10.7589	M	143	98	58	90	13	15	4	28,19	23168	3769	14,0	1 254,7	0,768	0,1	1352
18	2021-12-28	M	2011-02-24	10.8493	M	141	103	65	100	10	12	2	30,60	26100	4500	14,7	1 293,3	0,811	0,5	2027
39	2022-03-08	M	2011-04-28	10.8685	M	157.5	115	72	77	20	24	3	44,64	31825	10931	25,6	1 887,2	0,909	1,5	1586
155	2022-03-08	M	2011-03-08	11.0082	M	143.5	110	70	70	11	12	2	40,19	24364	14439	37,2	1 389,4	0,781	0,4	1350
167	2022-03-10	M	2010-11-19	11.3123	M	145	105	60	64	19	20	2	36,97	27767	7688	21,7	1 517,2	0,825	0,4	1360
21	2022-03-09	M	2010-10-26	11.3753	M	151	120	75	76	19	21	3	55,41	31029	22648	42,2	1 737,5	0,882	1,0	1455
160	2022-03-09	M	2010-10-25	11.3781	M	150	94	49	66	20	23	2	33,73	27662	4445	13,8	1 622,8	0,855	0,7	1143
166	2022-03-10	M	2010-10-03	11.4411	M	152	99	51	54	18	14	1	44,54	30952	11924	27,8	1 665,2	0,852	0,6	1500
141	2022-02-09	M	2010-09-03	11.4438	M	152	99	65	63	16	12	1	32,97	26452	5101	16,2	1 413,6	0,758	-0.3	1130
100	2022-03-09	M	2010-09-29	11.4493	M	151	97	52	62	17	17	2	38,72	29446	7598	20,5	1 672,5	0,869	0,8	1453
122	2022-03-09	M	2010-08-09	11.589	M	151	97	45	91	12	14	4	37,30	27129	8611	24,1	1 558,8	0,748	-0.5	1357
88	2022-03-09	M	2010-07-25	11.6301	W	140	133	73	72	15	13	4	35,67	24616	9789	28,5	1 266,6	0,751	-0.5	1377
124	2022-03-09	M	2010-07-15	11.6575	M	150	135	78	90	23	21	1	44,50	33725	9050	21,2	1 725,2	0,939	1,4	1627
80	2022-03-09	M	2010-07-01	11.6959	M	148	100	63	70	17	20	1	36,25	30382	4461	12,8	1 408,3	0,744	-0.6	1414
48	2022-03-09	M	2010-06-21	11.7233	M	159	105	59	79	18	21	2	41,85	31854	8323	20,7	1 668,0	0,846	0,4	1462
165	2022-03-10	M	2010-06-01	11.7808	M	149	104	55	71	15	15	2	35,83	26857	7520	21,9	1 457,6	0,802	0,0	1362
9	2022-03-09	M	2010-05-30	11.7836	W	153	115	32	60	19	21	2	41,18	30865	8643	21,9	1 675,8	0,854	0,5	1486
110	2022-03-09	M	2010-04-29	11.8685	W	151	88	56	74	18	15	3	43,03	31146	10266	24,8	1 614,7	0,834	0,2	1807
149	2022-03-09	M	2010-04-11	11.9178	W	145	102	64	88	15	16	1	32,72	25360	5970	19,1	1 391,6	0,719	-0.9	1285
133	2022-03-09	M	2010-03-29	11.9534	M	153	93	50	59	19	20	4	45,63	31433	12582	28,6	1 615,0	0,824	0,1	1490
91	2022-03-09	M	2010-03-14	11.9945	W	150	131	73	94	16	17	4	47,10	32237	13122	28,9	1 742,3	0,926	1,0	1755
42	2022-02-10	M	2010-01-22	12.0603	M	150	85	48	63	17	16	4	40,17	26707	11889	30,8	1 575,3	0,814	-0.1	965
134	2022-03-09	M	2010-02-17	12.063	M	158	108	58	70	15	18	1	51,37	35840	13531	27,4	1 999,1	0,945	0,9	1759
60	2022-03-09	M	2010-01-29	12.1151	M	144	112	68	81	18	18	1	34,98	27298	6343	18,9	1 340,0	0,741	-0.8	1361
65	2022-03-09	M	2010-01-09	12.1699	W	159	121	72	61	24	24	4	49,13	34724	12358	26,2	2 044,6	0,992	2,0	1593
56	2022-02-08	M	2009-11-13	12.2466	M	143	92	62	86	10	8	2	37,74	25271	11046	30,4	1 426,5	0,756	-0.7	1448
90	2022-03-10	M	2009-10-24	12.3836	W	155	110	61	53	19	17	2	44,32	32403	10158	23,9	1 760,2	0,857	0,2	1355
28	2022-03-10	M	2009-10-23	12.3863	M	158	111	67	57	16	16	2	49,28	30525	17056	35,8	1 696,2	0,860	0,2	1501
117	2022-12-28	M	2010-07-31	12.4192	M	148	123	74	106	18	18	1	41,10	33200	8200	19,8	1 711,2	0,856	-0.3	1729
15	2022-03-10	M	2009-10-08	12.4274	M	163	104	64	81	20	22	2	48,06	33830	12181	26,5	2 050,1	0,942	1,0	1314
140	2022-02-09	M	2009-09-09	12.4274	M	148	99	60	70	14	17	1	36,57	25169	10006	28,4	1 392,8	0,749	-0.8	1296
158	2021-12-28	M	2009-07-23	12.4411	M	152	114	65	95	20	24	4	42,00	34600	7400	17,6	1 517,2	0,825	0,4	1550
84	2022-02-08	M	2009-09-01	12.4466	M	152.5	115	68	83	17	19	2	38,56	29683	7196	19,5	1 681,8	0,867	0,3	1275
93	2022-02-10	M	2009-09-02	12.4493	M	164	124	77	97	30	27	3	58,44	37918	18373	32,6	2 153,9	0,996	1,5	2088
75	2022-02-10	M	2009-09-01	12.4521	W	154	98	65	84	19	18	2	35,56	27913	6065	17,8	1 577,1	0,834	0,0	1479
55	2022-02-10	M	2009-08-05	12.526	W	154	111	66	92	22	22	4	51,05	29778	19660	39,8	1 615,3	0,837	0,0	1523
161	2022-02-08	M	2009-08-01	12.5315	M	159	118	60	78	21	19	4	47,02	35890	9151	20,3	1 976,4	0,916	0,7	1948
3	2022-02-09	M	2009-07-07	12.6027	M	152.5	119	61	79	14	19	2	42,46	30765	9880	24,3	1 815,1	0,855	0,1	1614
57	2022-02-09	M	2009-07-01	12.6192	M	151.5	107	60	65	15	18	4	41,30	30030	9738	24,5	1 536,4	0,804	-0.4	1557
77	2022-02-08	M	2009-06-09	12.6767	M	148	107	53	66	16	13	2	44,80	34700	11100	24,3	1 668,0	0,846	0,4	1673
139	2022-02-08	M	2009-03-12	12.9205	M	160	98	59	81	19	18	1	45,24	33432	9829	22,7	1 978,4	0,952	0,8	1708
132	2022-02-08	M	2009-01-25	13.0466	W	154.5	102	55	71	26	26	2	46,28	33460	10901	24,6	1 924,0	0,968	0,9	1642
148	2022-02-03	M	2009-01-12	13.0685	W	165	110	62	73	33	33	4	59,10	47079	9623	17,0	2 394,7	1,015	1,3	2033
137	2022-02-09	M	2009-01-10	13.0904	W	161	119	61	101	30	34	2	50,80	40201	8552	17,5	2 042,6	0,938	0,6	1589
24	2022-02-08	M	2009-01-02	13.1096	M	165	117	61	68	22	25	1	47,47	37492	7802	17,2	2 178,4	0,972	0,9	1709
46	2022-02-08	M	2008-12-15	13.1589	M	160	108	59	85	23	19	4	48,03	34184	11850	25,7	2 000,3	0,956	0,7	1753
95	2022-02-10	M	2008-12-03	13.1973	W	157	111	72	84	19	21	2	44,42	32944	9645	22,6	1 832,3	0,890	0,1	1631
87	2022-02-03	M	2008-11-24	13.2027	M	161	102	64	59	21	20	3	47,37	36446	8901	19,6	2 021,1	0,928	0,5	1961
47	2022-02-03	M	2008-10-30	13.2712	M	160	120	70	95	26	30	2	59,50	43550	13556	23,7	2 388,9	0,991	1,0	2129
123	2022-02-03	M	2008-09-16	13.3918	M	166	119	58	83	30	31	1	54,22	42763	9152	17,6	2 302,6	1,003	1,0	2195
43	2022-02-08	M	2008-09-04	13.4384	M	178	139	83	103	38	33	2	64,18	50798	10553	17,2	2 829,6	1,192	2,6	2484
17	2022-02-03	M	2008-08-24	13.4548	M	164	138	74	84	31	23	1	54,80	44672	7872	15,0	2 252,4	1,028	1,2	2063
37	2022-02-03	M	2008-08-23	13.4575	M	160	115	70	98	23	24	4	51,75	42754	6897	13,9	2 097,7	1,005	1,0	1917
82	2022-02-08	M	2008-08-22	13.474	M	172	105	59	70	30	29	3	61,25	49777	9019	15,3	2 458,7	1,049	1,4	2394
147	2022-02-08	M	2008-08-04	13.5233	M	154.5	99	61	61	21	17	4	40,07	31683	6674	17,4	1 711,2	0,856	-0.3	1429
27	2022-02-08	M	2008-07-26	13.5479	M	172	129	67	103	41	36	4	55,30	45810	7190	13,3	2 189,7	0,953	0,5	2129
41	2022-02-09	M	2008-07-18	13.5726	M	153	117	67	87	24	25	4	52,16	35598	14768	29,3	1 797,4	0,891	0,0	1948
164	2022-02-08	M	2008-06-16	13.6575	M	147.5	98	66	81	12	17	2	33,21	23048	8891	27,8	0,745	0,745	-1.3	1548
116	2022-02-09	M	2008-06-09	13.6795	M	167	115	62	75	26	27	2	51,48	41868	7485	15,2	2 124,4	0,999	0,9	2043
154	2022-02-09	M	2008-06-05	13.6904	W	177	125	80	91	32	34	2	71,31	50369	18489	26,9	2 449,6	0,957	0,5	2128
26	2022-02-08	M	2008-03-27	13.8795	M	168	98	65	87	24	26	2	49,64	41128	6325	13,3	2 189,7	0,963	0,5	2060
19	2022-02-02	M	2008-02-22	13.9562	M	160	109	66	104	21	25	4	43,49	34747	6778	16,3	1 966,0	0,924	0,1	1742
7	2022-02-03	M	2008-02-12	13.9863	M	164	123	51	96	27	24	2	55,35	43602	9721	18,2	2 022,7	0,892	-0.2	2071
25	2022-02-09	M	2008-02-16	13.9918	W	168.5	127	58	83	33	41	4	60,44	49571	8081	14,0	2 784,0	1,195	2,3	2273
76	2022-03-10	M	2008-03-13	14	W	163	113	59	58	26	27	1	52,48	40974	9522	18,9	1 979,9	0,928	0,1	1663
127	2022-02-09	M	2008-02-03	14.0274	W	177	106	66	80	30	29	4	54,80	45421	7181	13,7	2 199,4	0,941	0,2	2579
44	2022-02-09	M	2008-01-28	14.0438	M	167	117	69	87	20	23	1	49,65	40453	6960	14,7	2 232,1	1,039	1,0	1798
146	2022-02-03	M	2008-01-11	14.074	M	161	133	80	89	34	34	4	51,48	42188	7044	14,3	2 245,2	1,061	1,2	2046
102	2022-02-10	M	2008-01-10	14.0959	W	164	122	69	74	21	20	1	56,37	36182	17937	33,1	2 253,4	1,035	1,0	1799
5	2022-03-10	M	2008-01-22	14.1397	M	161	111	56	69	21	25	2	48,77	38554	8190	17,5	2 023,0	0,974	0,4	1702
40	2022-02-02	M	2007-12-07	14.1671	M	172	107	49	68	22	22	1	51,29	40460	8386	17,2	2 439,4	1,046	1,0	1917
151	2022-02-02	M	2007-11-08	14.2466	W	169	106	66	57	24	29	4	52,81	44254	6157	12,2	2 401,1	1,039	0,9	1965
86	2022-03-10	M	2007-10-29	14.3726	M	164	108	64	63	30	33	1	49,95	37872	9768	20,5	2 311,4	1,006	0,6	1577
33	2022-02-02	M	2007-09-21	14.3781	M	183	133	70	60	30	32	1	61,70	49576	9594	16,2	2 527,9	1,087	1,3	2262
52	2022-02-01	M	2007-08-25	14.4493	W	171	131	71	67	25	30	4	58,38	48736	7114	12,7	2 526,6	1,025	0,7	2182
6	2022-02-01	M	2007-08-17	14.4712	M	175	109	64	69	25	26	1	52,30	43421	6602	13,2	2 272,8	1,002	0,5	1994
120	2022-02-02	M	2007-07-25	14.537	M	168	132	72	83	36	36	2	61,35	49137	9398	16,1	2 814,6	1,190	2,0	2327
145	2022-02-01	M	2007-07-09	14.5781	M	181	104	57	67	39	39	2	69,25	56791	9698	14,6	2 761,3	1,163	1,8	2405
78	2022-02-01	M	2007-06-28	14.6082	M	171	125	75	83	24	24	1	50,13	40902	7035	14,7	2 190,6	1,014	0,3	1990
144	2022-02-01	M	2007-06-19	14.6329	M	180	117	72	75	32	36	1	65,26	53170	9211	14,8	2 882,6	1,157	1,7	2201
152	2022-02-01	M	2007-06-11	14.6548	M	175	106	53	61	35	40	2	65,46	55451	7221	11,5	2 790,5	1,095	1,2	2012
23	2022-02-02	M	2007-06-04	14.6767	W	170	120	79	81	25	30	2	60,35	39976	18005	31,1	2 372,0	0,991	0,4	1804
53	2022-02-01	M	2007-05-30	14.6877	W	172	118	66	79	17	19	2	56,03	46632	7028	13,1	2 370,3	1,047	0,8	2094
130	2022-02-02	M	2007-05-14	14.7342	M	170	118	77	74	30	35	4	62,47	50815	8904	14,9	2 753,3	1,144	1,5	1790
113	2022-02-01	M	2007-05-01	14.7671	M	161	106	60	51	25	24	2	45,40	34416	9166	21,0	1 812,7	0,878	-0.6	1709
83	2022-02-02	M	2007-03-19	14.8877	M	187	120	70	75	41	50	3	81,14	57392	20417	26,2	3 331,2	1,268	2,4	2431
69	2022-02-01	M	2007-03-15	14.8959	M	181.5	133	45	61	31	36	2	72,47	55237	13864	20,1	3 363,5	1,275	2,5	2304
105	2022-02-01	M	2006-10-30	15.2685	W	169	109	61	48	24	26	1	53,29	44453	6338	12,5	2 494,9	1,114	1,1	1716
183	2022-01-27	M	2006-10-22	15.2767	M	169	119	52	67	40	40	2	55,75	45855	7428	13,9	2 466,9	1,071	0,7	1878
66	2022-01-26	M	2006-10-07	15.3151	M	182	120	52	53	42	40	3	87,88	66822	17568	20,8	3 485,3	1,321	2,6	2723
45	2022-01-26	M	2006-08-28	15.4247	M	173	95	54	49	41	39	3	69,83	58456	8442	12,6	2 930,2	1,132	1,1	1948
72	2022-01-26	M	2006-08-07	15.4822	M	190	95	56	75	41	41	1	75,95	64139	8468	11,7	3 345,1	1,391	3,1	1935
49	2022-02-01	M	2006-08-01	15.5151	W	174	110	52	49	31	35	1	63,59	52387	8305	13,7	2 893,8	1,199	1,6	2062
71	2022-01-26	M	2006-07-18	15.537	W	178	124	76	65	28	30	2	65,02	50932	10730	13,2	3 360,3	1,331	2,6	1983
114	2022-01-27	M	2006-07-09	15.5644	M	171	109	63	61	32	35	3	64,01	55660	5743	9,4	2 606,2	1,125	1,0	1833
118	2022-01-27	M	2006-07-07	15.5699	M	171	108	38	68	19	24	2	57,89	46426	8651	15,7	2 817,1	1,240	1,9	1782
157	2022-01-27	M	2006-06-27	15.5973	W	173	107	66	63	36	39	2	66,23	54337	9011	14,2	2 877,6	1,271	2,1	1890
89	2022-01-26	M	2006-06-23	15.6055	M	193	127	66	62	43	47	2	86,47	69460	13292	16,1	3 720,1	1,379	2,9	2469
107	2021-12-28	M	2006-05-10	15.6466	M	180	111	65	88	34	39	3	65,2	57600	7600	11,7	2 708,4	1,173	0,9	2027
106	2022-01-27	M	2006-05-30	15.674	W	179	107	63	76	40	39	2	68,14	58145	6776	10,4	3 219,7	1,390	2,9	1882
85	2022-02-01	M	2006-05-25	15.7014	M	172	108	55	59	35	40	4	74,43	58787	12468	17,5	3 173,2	1,337	2,4	2027
184	2022-01-27	M	2006-05-16	15.7123	M	168	111	63	76	26	27	4	65,32	49982	12692	20,3	2 644,4	1,182	1,4	2050
191	2022-01-27	M	2006-04-14	15.8	W	178	121	58	66	36	35	2	70,13	56493	10784	16,0	2 854,1	1,141	1,0	2421
136	2022-01-27	M	2006-04-11	15.8082	M	175	133	66	66	41	41	2	76,93	57318	16496	22,3	3 117,5	1,272	2,0	2262
14	2022-01-26	M	2006-03-27	15.8466	W	178	122	64	55	46	47	4	73,46	60229	9965	14,2	3 265,9	1,240	1,8	2148
188	2022-01-27	M	2006-02-13	15.9644	M	168	113	53	68	37	32	4	58,94	48019	8202	14,6	2 721,4	1,278	1,8	1881
8	2022-01-26	M	2006-01-11	16.0521	M	171	105	45	74	42	35	2	57,14	48221	6344	11,6	2 580,0	1,140	0,9	1955
31	2022-02-03	M	2006-01-13	16.0685	M	189.5	121	75	72	33	32	3	75,29	59295	12810	17,8	3 182,0	1,244	1,7	2159
61	2022-01-27	M	2006-01-05	16.0712	M	179	127	61	78	31	40	2	65,85	50589	12585	19,9	2 674,5	1,114	0,7	1809
112	2022-01-27	M	2006-01-02	16.0795	W	171	112	72	90	26	29	4	58,99	48857	7497	13,3	2 634,0	1,109	0,7	1869
121	2022-02-02	M	2005-10-18	16.3041	M	178	120	69	66	36	38	2	67,27	56596	7625	11,9	3 052,9	1,245	1,6	2427
190	2022-02-03	M	2005-09-29	16.3589	M	180	112	42	48	37	38	4	69,37	56243	9731	14,7	3 398,2	1,311	2,0	2069
206	2022-03-30	M	2005-10-28	16.4301	M	168	114	65	64	35	40	4	64,06	52301	9075	14,8	2 680,0	1,160	0,9	1904
197	2022-04-01	M	2005-09-09	16.5699	W	192	116	68	57	33	35	3	84,63	65774	15034	18,6	3 822,2	1,343	2,1	2341
200	2022-04-01	M	2005-09-03	16.5863	W	176	112	67	48	33	30	1	64,38	53364	7998	13,0	3 021,5	1,211	1,2	2158
207	2022-03-30	M	2005-08-22	16.6137	W	183	120	78	59	46	47	1	73,44	61791	8490	12,1	3 164,3	1,254	1,5	2043
104	2022-02-03	M	2005-06-26	16.6192	W	182	118	66	89	37	42	3	89,54	67728	18160	21,1	3 647,7	1,345	2,1	2565
142	2022-02-02	M	2005-06-15	16.6466	W	172	98	41	53	37	37	4	62,87	51163	8878	14,8	2 826,2	1,176	1,0	2390
98	2022-02-03	M	2005-05-18	16.726	M	183	113	58	63	43	46	2	72,48	60946	8061	11,7	3 470,3	1,343	2,1	2203
186	2022-02-03	M	2005-05-06	16.7589	M	170	112	62	73	45	43	2	64,04	52794	8416	13,7	2 829,9	1,210	1,2	1843
111	2022-02-03	M	2005-04-19	16.8055	W	173	109	57	54	41	45	4	72,64	59825	9589	13,8	3 230,4	1,166	0,9	1755
205	2022-03-30	M	2005-06-13	16.8055	W	185	119	71	58	32	40	4	62,07	49231	10009	16,9	2 834,9	1,185	1,0	1715
11	2022-02-02	M	2005-04-13	16.8192	W	175	135	67	87	35	40	2	74,54	57478	13825	19,4	3 236,7	1,215	1,2	2259
12	2022-02-02	M	2005-04-13	16.8192	W	169	137	64	93	34	34	2	82,87	53934	25910	32,5	3 028,4	1,220	1,3	2139
203	2022-03-30	M	2005-05-16	16.8822	M	191	119	73	54	37	40	2	71,31	58888	9463	13,8	2 958,9	1,137	0,7	1900
199	2022-04-01	M	2005-05-09	16.9068	M	168	92	53	53	33	41	4	73,82	60661	10370	14,6	2 793,2	1,199	1,1	2166
195	2022-04-05	M	2005-05-09	16.9178	M	169	112	72	70	31	29	2	57,96	44737	10669	19,3	2 554,1	1,147	0,8	1799
198	2022-04-01	M	2005-04-14	16.9753	W	181	126	68	52	42	49	4	66,69	52437	11127	17,5	3 126,	1,250	1,5	2170
35	2022-02-03	M	2005-01-28	17.0274	M	185.5	117	46	51	46	50	2	80,19	64492	64492	15,7	3 717,9	1,360	2,3	2394
194	2022-04-05	M	2005-03-25	17.0411	M	190	107	64	56	30	42	1	80,12	67275	9340	12,2	3 504,0	1,320	2,0	2778
196	2022-04-05	M	2005-03-25	17.0411	M	184	107	64	56	30	42	2	79,41	60724	14821	19,6	3 866,8	1,377	2,4	2019
208	2022-03-30	M	2005-03-17	17.0466	M	168	128	82	78	41	46	4	61,41	49165	9332	16,0	2 917,5	1,206	1,2	1923
143	2022-02-03	M	2005-01-20	17.0493	M	178	102	55	47	46	47	4	74,29	60867	10393	14,6	3 030,7	1,246	1,5	1894
193	2022-04-05	M	2005-03-12	17.0767	W	178	115	68	52	48	40	3	76,49	62947	9861	13,5	3 679,7	1,401	2,5	2242
204	2022-03-30	M	2005-02-25	17.1014	M	182	100	45	66	36	34	1	67,13	56580	7473	11,7	3 073,4	1,224	1,3	1932
202	2022-04-01	M	2005-01-18	17.211	W	180	108	65	73	37	38	4	65,92	51332	12054	19,0	2 537,4	1,038	0,0	1937
10	2022-03-23	M	2005-01-04	17.2247	M	190	109	64	65	45	42	2	87,54	66443	17475	20,8	3 617,2	1,283	1,7	2199
126	2022-03-22	M	2004-11-29	17.3205	M	176	118	63	53	30	32	3	73,27	57591	12481	17,8	3 195,6	1,246	1,5	2349
36	2022-03-23	M	2004-11-09	17.3781	M	168	137	80	89	33	35	4	66,63	51948	11746	18,4	2 932,1	1,182	1,0	1924
67	2022-03-23	M	2004-10-29	17.4082	M	184	121	73	47	43	39	1	69,58	59203	7057	10,7	3 319,0	1,200	1,1	1847
64	2022-03-23	M	2004-09-23	17.5068	M	187	101	43	43	21	25	3	95,71	68490	23013	25,2	4 210,2	1,412	2,6	1913
201	2022-04-01	M	2004-08-21	17.6219	M	173	106	66	61	31	34	4	73,27	56353	14075	20,0	2 837,7	1,197	1,1	1804
13	2022-03-22	M	2004-08-09	17.6274	M	182	142	65	70	44	41	2	67,64	57568	6773	10,5	3 300,0	1,374	2,3	2275
59	2022-03-23	M	2004-08-03	17.6466	W	181	139	44	59	49	53	4	72,81	61598	7736	11,2	3 480,9	1,362	2,3	1940
54	2022-03-22	M	2004-07-28	17.6603	W	185	143	87	65	37	41	1	81,65	64999	12975	16,6	3 674,7	1,346	2,2	2388
22	2022-03-23	M	2004-07-09	17.7151	W	174	115	67	66	45	42	1	67,53	56086	8463	13,1	2 978,7	1,234	1,4	1820
32	2022-03-23	M	2004-06-16	17.7781	W	179.5	113	67	52	40	40	2	76,43	59844	13061	17,9	3 523,8	1,298	1,8	1722
109	2022-03-23	M	2004-05-26	17.8356	M	191	111	62	58	46	40	2	87,20	71423	11656	14,0	4 123,7	1,401	2,5	2370
38	2022-03-22	M	2004-05-16	17.8603	W	185	129	76	77	34	38	4	83,08	61583	17857	22,5	3 637,3	1,367	2,3	2121
99	2022-03-23	M	2004-05-05	17.8932	W	179	138	45	60	47	47	4	76,39	59639	13261	18,2	3 494,4	1,263	1,6	2171
16	2022-03-23	M	2004-04-23	17.926	W	184	131	46	59	27	30	3	73,77	58859	11576	16,4	3 335,5	1,166	0,9	1791
131	2022-03-23	M	2004-04-22	17.9288	W	173	130	69	49	40	48	3	64,01	53407	7896	12,9	2 708,4	1,173	0,9	1812
162	2022-03-22	M	2004-04-13	17.9507	W	177	119	65	67	41	40	4	61,39	52205	6667	11,3	2 519,6	1,025	-0.1	2338
163	2022-03-23	M	2004-04-13	17.9534	M	176	116	64	71	39	40	2	57,10	49229	5552	10,1	2 321,0	0,941	-0.7	2041
29	2022-03-22	M	2004-04-05	17.9726	W	174	132	75	72	50	45	3	76,04	61635	10908	15,0	3 502,2	1,310	1,9	2357
156	2022-03-22	M	2004-04-03	17.9781	W	173	108	60	51	35	41	2	68,95	53088	12866	19,5	2 992,7	1,319	2,0	1753
153	2022-03-22	M	2004-01-30	18.1534	M	176	113	67	45	31	34	1	63,55	51931	8509	14,1	3 110,7	1,242	1,4	1471
73	2022-03-22	M	2004-01-06	18.2192	M	179	122	70	62	31	29	2	69,52	56678	9947	14,9	2 898,4	1,087	0,3	2220
128	2022-03-22	M	2003-12-05	18.3068	M	175	128	68	54	47	49	4	80,35	62452	14370	18,7	3 526,8	1,346	2,2	2508
182	2022-03-24	M	2003-12-03	18.3178	M	180	115	58	47	44	49	1	85,04	68072	13160	16,2	3 809,4	1,443	2,8	1948
129	2022-03-24	M	2003-11-17	18.3616	W	177	118	68	66	35	40	2	76,69	63864	9374	12,8	3 453,8	1,280	1,7	1887
97	2022-03-24	M	2003-11-04	18.3973	M	170.5	121	75	62	44	36	2	67,13	51229	12825	20,2	3 072,1	1,289	1,8	2010
96	2022-03-24	M	2003-10-03	18.4849	M	174	126	65	51	50	48	1	74,33	60929	9952	14,0	3 447,8	1,303	1,9	1996
30	2022-03-24	M	2003-09-28	18.4986	W	179	133	88	77	38	38	4	78,88	57581	17515	23,3	3 788,7	1,383	2,4	1879
79	2022-03-24	M	2003-09-24	18.5096	W	179	119	66	51		48	4	82,04	63083	15462	19,7	3 492,6	1,286	1,7	1786
58	2022-03-24	M	2003-08-28	18.5836	W	178	124	77	58	48	47	2	78,19	60286	14538	19,4	3 364,2	1,346	2,2	1767
94	2022-02-09	M	2003-07-16	18.5836	M	181	125	67	68	41	39	4	67,71	55688	8505	13,2	3 512,7	1,363	2,3	2402
159	2022-03-22	M	2003-06-05	18.8082	M	188	134	82	64	29	36	3	85,95	62907	19539	23,7	3 501,6	1,253	1,5	2226
63	2022-03-24	M	2003-05-17	18.8658	W	169	117	63	55	40	44	2	68,75	54839	10985	16,7	2 930,5	1,226	1,3	1877
34	2022-03-22	M	2003-04-26	18.9178	W	180	133	71	58	42	35	2	73,93	59529	11015	15,6	3 381,2	1,302	1,9	1980
172	2022-03-24	M	2003-04-25	18.926	M	187	121	54	52	51	46	2	82,24	69419	9154	11,6	3 664,4	1,284	1,7	2087
50	2022-03-22	M	2003-02-16	19.1068	M	187	134	72	76	39	49	4	81,89	66049	11999	15,4	3 843,9	1,412	2,6	2155
103	2022-03-22	M	2003-02-04	19.1397	M	178	135	62	43	40	46	4	78,02	61935	12615	16,9	3 471,4	1,307	1,9	2144
68	2022-03-24	M	2003-01-14	19.2027	W	178	127	61	69	35	38	4	69,74	57016	9444	14,2	3 276,6	1,221	1,3	2056
51	2022-03-23	M	2003-01-10 00:46:05	19.2109	W	169	120	75	54	40	37	4	62,27	52542	6784	11,4	2 944,0	1,183	1,0	1528
